# Supplementary material
Source: Springer Nature journal article supplement (https://www.springermedizin.de/resource/supplementary/12906_2010_470_MOESM2_ESM.pdf/9519566)

## Effect of Plumbagin on the elicitation of IgG subclasses specific to collagen Type II arthritis

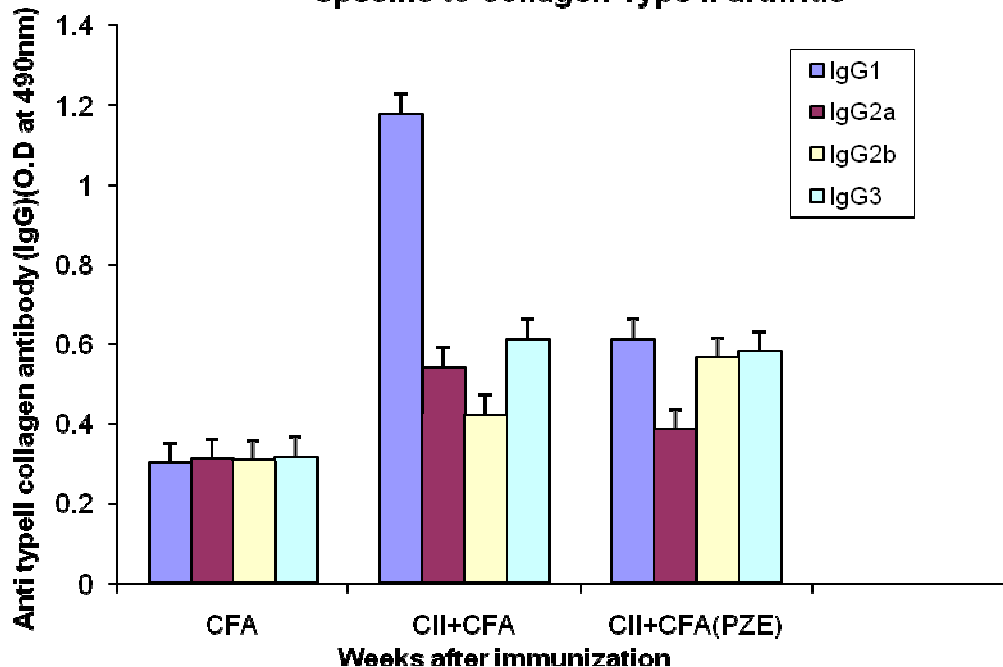

Supplement: MOESM2 [file 9519566]
